# Supplementary material
Source: publisher figshare collection journal article supplement (https://acs.figshare.com/ndownloader/files/8611735)
Supplement: Supplementary file 1 [file 8611735]

## Supporting Information

### Differential Phosphoproteomic Analysis of Recombinant Chinese Hamster Ovary Cells Following Temperature Shift

Michael Henry<sup>1¶</sup>, Martin Power<sup>1¶</sup>, Prashant Kaushik<sup>1</sup>, Orla Coleman<sup>1</sup>, Martin Clynes<sup>1¶</sup>, Paula Meleady<sup>1¶\*</sup>

<sup>1</sup>National Institute for Cellular Biotechnology, Dublin City University, Glasnevin, Dublin 9, Ireland.

\* Corresponding author: Dr. Paula Meleady;  
Tel: +353-1-7005910; Email: paula.meleady@dcu.ie

¶ these authors contributed equally to the work

### Contents

**Supplementary Figure S-1:** CHO-specific sequence for NDRG1 aligned against human NDRG1 sequence showing conservation of the phosphorylation site (RED BOX) that was detected using the phospho-specific antibody to NDRG1. (Page S3)

**Supplementary Figure S-2:** CHO-specific sequence for ATF2 aligned against human ATF2 sequence showing conservation of the phosphorylation site (RED BOX) that was detected using the phospho-specific antibody to ATF2. (Page S4)

*The following are supplied in an additional xlsx worksheet*

**Supplementary Table S-1:** Full list of differentially expressed phosphopeptides from TiO<sub>2</sub> enrichment with increased expression at 31°C compared to 37°C. The table also includes associated MS data.

**Supplementary Table S-2:** Full list of differentially expressed phosphopeptides from TiO<sub>2</sub> enrichment with decreased expression at 31°C compared to 37°C. The table also includes associated MS data.

**Supplementary Table S-3:** Full list of differentially expressed phosphopeptides from Fe-NTA (IMAC) enrichment with increased expression at 31°C compared to 37°C. The table also includes associated MS data.

**Supplementary Table S-4:** Full list of differentially expressed phosphopeptides from Fe-NTA (IMAC) enrichment with decreased expression at 31°C compared to 37°C. The table also includes associated MS data.

**Supplementary Table S-5:** List of differentially expressed proteins from non-enriched whole cell lysates (WCL) with increased expression at 31°C compared to 37°C.

**Supplementary Table S-6:** List of differentially expressed proteins from non-enriched whole cell lysates (WCL) with decreased expression at 31°C compared to 37°C.

**Supplementary Table S-7:** MS data associated with Supplementary Tables S-5 and S-6.

**Supplementary Table S-8:** Overlapping differentially expressed proteins which contained peptides in common between the phosphoproteomic analysis and the whole cell lysate non-enriched proteomic analysis.

**Supplementary Table S-9:** Overlapping differentially expressed proteins which did not share common peptides between the phosphoproteomic analysis and the whole cell lysate non-enriched proteomic analysis.

| Score          | Expect                                                        | Method                       | Identities   | Positives    | Gaps       |
|----------------|---------------------------------------------------------------|------------------------------|--------------|--------------|------------|
| 702 bits(1811) | 0.0                                                           | Compositional matrix adjust. | 340/388(88%) | 351/388(90%) | 20/388(5%) |
| Query 1        | MSREMQDQVDLAEVKPLVEKGETITGLLQEFQDIETLHGSVHVTLCGTPKGNRPVIL     |                              |              |              | 60         |
| Sbjct 1        | MSRE+ DVDLAEVKP ETITGLLQEFQDIETLHGS+HVTLCGTPKGNRPVIL          |                              |              |              | 60         |
| Query 61       | TYHDIGMNHKTCYNPLFNIEDMQEITQHFVCHVDAPGQQDGAASFPAGYMYPSMDQLAE   |                              |              |              | 120        |
| Sbjct 61       | TYHDIGMNHKTCYNPLFNIEDMQEITQHFVCHVDAPGQQDGA SFPAGYMYPSMDQLAE   |                              |              |              | 120        |
| Query 121      | MLPGVLQQFGLKSIIGMTGAGAYILTRFALNNPEMVEGLVLINNVNCAEGWMDWAASKI   |                              |              |              | 180        |
| Sbjct 121      | MLPGVL QFGLKS+IGMTGAGAYILTRFALNNPEMVEGLVL+NVNCAEGWMDWAASKI    |                              |              |              | 180        |
| Query 181      | SGWTQALPDMVVSHLFGKEEQSNVEVVHTYRQHI+NDMNP NLHLFI+AYNSRRDLEIE   |                              |              |              | 240        |
| Sbjct 181      | SGWTQALPDMVVSHLFGKEEIHNSVEVVHTYRQHILNDMNPSNLHLFISAYNSRRDLEIE  |                              |              |              | 240        |
| Query 241      | RPMPGTHVTTLQCPALLVVGDS+SPAVDAVVECNKLDPTKTTLLKMADCGGLPQISQPAK  |                              |              |              | 300        |
| Sbjct 241      | RPMPGTHVTTLQCPALLVVGDN+SPAVDAVVECNKLDPTKTTLLKMADCGGLS QISQPAK |                              |              |              | 300        |
| Query 301      | LAEAFKYFVQGMGYMPSASMTLRMSRTASGSSVTSLDGTRSRSHSEGT              |                              |              |              | 360        |
| Sbjct 301      | LAEAFKYFVQGMGYMPSASMTLRMSRTASGSSVTS+G RSRSHSE R               |                              |              |              | 351        |
| Query 361      | RRSHTSEGAHLDITPNSGAAGNSAGPK                                   |                              |              |              | 388        |
| Sbjct 352      | -----LNITPNSGATGNNAGPN                                        |                              |              |              | 368        |

**Supplementary Figure S-1:** CHO-specific sequence for NDRG1 aligned against human NDRG1 sequence showing conservation of the phosphorylation site (RED BOX) that was detected using the phospho-specific antibody to NDRG1.

Range 1: 1 to 388 [Graphics](#) ▼ Next Match ▲ Previous Match

| Score          | Expect   | Method                       | Identities                  | Positives         | Gaps                |                 |
|----------------|----------|------------------------------|-----------------------------|-------------------|---------------------|-----------------|
| 722 bits(1864) | 0.0      | Compositional matrix adjust. | 376/486(77%)                | 382/486(78%)      | 98/486(20%)         |                 |
| Query 19       | MSDDKPF  | LCTAPGCGQ                    | RFTNEDHLAVHKHKHEMTLKFGPARND | SVIVAD            | TRTPTRFLKN 78       |                 |
| Sbjct 1        | MSDDKPF  | LCTAPGCGQ                    | RFTNEDHLAVHKHKHEMTLKFGPARND | SVIVAD            | TRTPTRFLKN 60       |                 |
| Query 79       | CEEVGLF  | NELASPFENE                   | FKKASEDDIKKMPDL             | SPLATPIIRSKIEEPSV | VETTHQDSPL 138      |                 |
| Sbjct 61       | CEEVGLF  | NELASPFENE                   | FKKASEDDIKKMPDL             | SPLATPIIRSKIEEPSV | VETTHQDSPL 120      |                 |
| Query 139      | PHPESTT  | SDEKEVPLAQ                   | TASIVRPASLQV                | PNVLLTSSDSSV      | IIQQAVPSPTSSTVI 198 |                 |
| Sbjct 121      | PHPESTT  | -----                        | SD ++                       | -----             | SDEKLV----- 133     |                 |
| Query 199      | TQAPSSNR | PVPGPFLL                     | LHLPNGQTM                   | PAIPASITSSNV      | HVPAAPVLRPVTM       | VPVSV 258       |
| Sbjct 134      | -----    | RPV                          | -----                       | -----             | -----MVPSV 142      |                 |
| Query 259      | PGIPGPSS | PQPVQSEAK                    | MRLKAALTQQHPP               | VTNGDTVKGHGS      | GLVRTQSEESR         | PQSLQQP 318     |
| Sbjct 143      | PGIPGPSS | PQPVQSEAK                    | MRLKAALTQQHPP               | VTNGDTVKGHGS      | GLVRTQSEESR         | PQSLQQP 202     |
| Query 319      | ATSTTTET | PASPAHTT                     | PQTQSTSGRRRA                | ANEDPDEKRRK       | FLERNRAAAS          | RCRQKRKVWVQ 378 |
| Sbjct 203      | ATSTTTET | PASPAHTT                     | PQTQSTSGRRRA                | ANEDPDEKRRK       | FLERNRAAAS          | RCRQKRKVWVQ 262 |
| Query 379      | SLEKKAED | LSSNLGQL                     | QSEVTLLRNEVA                | QKQLLLAHKDC       | PVTAHQKKSGY         | HADKDDSS 438    |
| Sbjct 263      | SLEKKAED | LSSNLGQL                     | QSEVTLLRNEVA                | QKQLLLAHKDC       | PVTAHQKKSGY         | HADKDDSS 322    |
| Query 439      | EDISVPSS | PHTEAIQHSS                   | VSTSNVSVSTSK                | AEAVATSVLTQ       | MADQSTEPALS         | QIVMAPSS 498    |
| Sbjct 323      | EDISVPSS | PHTEAIQHSS                   | VSTSNVSVSTSK                | AEAVATSVLTQ       | MADQSTEPALS         | QIVMAPSS 382    |
| Query 499      | QSQPSG   | 504                          |                             |                   |                     |                 |
| Sbjct 383      | QPQPSG   | 388                          |                             |                   |                     |                 |

**Supplementary Figure S-2:** CHO-specific sequence for ATF2 aligned against human ATF2 sequence showing conservation of the phosphorylation site (RED BOX) that was detected using the phospho-specific antibody to ATF2.
